# Supplementary material for: Prevalence and etiologies of pulmonary hypertension in Africa: a systematic review and meta-analysis
Source: PubMed Central journal article supplement (PMC5723068; doi:10.1186/s12890-017-0549-5), 2017-12-08
Supplement: 12890_2017_549_MOESM1_ESM.pdf [file 12890_2017_549_MOESM1_ESM.pdf]

**Supplemental file 1. Characteristics of included studies**

| First author | Year | Period of inclusion | Countries                                                   | Region        | Timing of data collection | Study Design    | Selection            | Area            | Setting        | Sample | Cases | Prevalence of PH | Etiologies of PH | Mean age, years | Median age, years | Min Age, years | Max Age, years | Male % | Diagnostic tool  | Population                                  |
|--------------|------|---------------------|-------------------------------------------------------------|---------------|---------------------------|-----------------|----------------------|-----------------|----------------|--------|-------|------------------|------------------|-----------------|-------------------|----------------|----------------|--------|------------------|---------------------------------------------|
| Adem         | 2014 | 2011-2013           | Ethiopia                                                    | Eastern       | Retrospective             | Cross sectional | Not random selection | Urban and Rural | Hospital-based | 1028   | 335   | 32.6%            | NR               | 51              | 52                | 20             | 98             | 48     | Echocardiography | Patients presenting with cardiac complaints |
| Amadi        | 2014 | 2012                | Nigeria                                                     | Western       | Prospective               | Cross sectional | Not random selection | Urban and Rural | Hospital-based | 92     | 22    | 23.9             | NR               | 25.4            |                   | 18             | 41             | 4537   | Echocardiography | Patients with sickle cell disease           |
| Amin         | 2003 |                     | Egypt                                                       | Northern      | Prospective               | Cross sectional | Not random selection | Urban and Rural | Hospital-based | 51     | 15    | 29.4%            | NR               | 43              | NR                | NR             | NR             | 55     | Echocardiography | Patients in hemodialysis                    |
| Bakari       | 2013 | 2009-2010           | Tanzania                                                    | Eastern       | Prospective               | Cross sectional | Not random selection | Urban and Rural | Hospital-based | 102    | 13    | 12.7%            | NR               | 42              | NR                | 18             | 72             | 31     | Echocardiography | Presentation with cardiac complaints + HIV  |
| Conteh       | 2016 | 2015                | Kenya                                                       | Eastern       | Prospective               | Cross sectional | Not random selection | Urban and Rural | Hospital-based | 63     | 16    | 25.4%            | NR               | 38              | NR                | 17             | 59             | 5      | Echocardiography | Patients with systemic lupus erythematosus  |
| Ezzahra      | 2015 |                     | Morocco                                                     | Northern      | Prospective               | Cross sectional | Not random selection | Urban and Rural | Hospital-based | 384    | 71    | 18.5%            | NR               | 64              | NR                | NR             | NR             | 60     | Echocardiography | Patients with heart failure                 |
| Ezzahra      | 2015 |                     | Morocco                                                     | Northern      | Retrospective             | Cross sectional | Not random selection | Urban and Rural | Hospital-based | 1613   | 339   | 21.0%            | NR               | NR              | NR                | NR             | NR             | NR     | Echocardiography | Patients with heart failure                 |
| Faqih        | 2016 | 2014                | Morocco                                                     | Northern      | Prospective               | Cross sectional | Not random selection | Urban and Rural | Hospital-based | 111    | 18    | 16.2%            | NR               | 44              | NR                | NR             | NR             | 49     | Echocardiography | Patients in hemodialysis                    |
| Gaber        | 2014 | 2010-2013           | Libya                                                       | Northern      | Retrospective             | Cross sectional | Not random selection | Urban and Rural | Hospital-based | 645    | 23    | 3.6%             | NR               | NR              | NR                | NR             | NR             | NR     | Echocardiography | Patients presenting with cardiac complaints |
| Kafata       | 2016 |                     | Congo, Brazzaville                                          | Central       | Prospective               | Cross sectional | Not random selection | Urban and Rural | Hospital-based | 79     | 42    | 53.2%            | NR               | 27              | NR                | NR             | NR             | 40     | Echocardiography | Patients with sickle cell disease           |
| Karaye       | 2013 |                     | Nigeria                                                     | Western       | Prospective               | Cross sectional | Not random selection | Urban and Rural | Hospital-based | 80     | 53    | 66.3%            | NR               | 46              | NR                | NR             | NR             | 39     | Echocardiography | Patients with heart failure                 |
| Kingue       | 2016 | 2004-2008           | Cameroon, Ivory Coast, Guinea, Mali, Nigeria, Senegal, Togo | Multinational | Prospective               | Cross sectional | Not random selection | Urban and Rural | Hospital-based | 3441   | 398   | 11.6%            | NR               | 31              | NR                | NR             | NR             | 40     | Echocardiography | Patients with rheumatic heart disease       |
| Mbolla       | 2016 | 2008-2012           | Congo, Brazzaville                                          | Central       | Prospective               | Cross sectional | Not random selection | Urban and Rural | Hospital-based | 113    | 8     | 7.1%             | NR               | NR              | NR                | NR             | NR             | 34     | Echocardiography | Patients presenting with cardiac complaints |
| Menanga      | 2015 | 2014                | Cameroon                                                    | Central       | Prospective               | Cross sectional | Not random selection | Urban           | Hospital-based | 44     | 13    | 29.5%            | NR               | 49              | NR                | 24             | 72             | 48     | Echocardiography | Presentation with cardiac complaints + HIV  |
| Methia       | 2016 | 2012-2013           | Algeria                                                     | Northern      | Retrospective             | Cross sectional | Not random selection | Urban and Rural | Hospital-based | 202    | 15    | 7.4%             | NR               | NR              | NR                | NR             | NR             | NR     | Right Heart Cath | Patients with systemic sclerosis            |
| Mocumbi      | 2016 |                     | Mozambique                                                  | Southern      | Prospective               | Cross sectional | Not random selection | Urban and Rural | Hospital-based | 272    | 8     | 2.9%             | NR               | 39              | NR                | NR             | NR             | 30     | Echocardiography | Presentation with cardiac complaints + HIV  |

|            |      |           |                                                |               |               |                 |                      |                 |                  |      |     |       |                                                                                                                                                                                                                                         |    |    |    |    |     |                  |                                                     |
|------------|------|-----------|------------------------------------------------|---------------|---------------|-----------------|----------------------|-----------------|------------------|------|-----|-------|-----------------------------------------------------------------------------------------------------------------------------------------------------------------------------------------------------------------------------------------|----|----|----|----|-----|------------------|-----------------------------------------------------|
| Okello     | 2013 | 2010-2012 | Uganda                                         | Eastern       | Prospective   | Cross sectional | Not random selection | Urban and Rural | Hospital-based   | 309  | 98  | 31.7% | NR                                                                                                                                                                                                                                      | NR | 30 | NR | NR | 37  | Echocardiography | Patients with rheumatic heart disease               |
| Reuben     | 2015 |           | Mauritius                                      | Western       | Retrospective | Cross sectional | Not random selection | Urban and Rural | Hospital-based   | 259  | 178 | 68.7% | NR                                                                                                                                                                                                                                      | NR | NR | NR | NR | NR  | Echocardiography | Patients with cardiac surgery                       |
| Sliwa      | 2012 | 2006-2008 | South Africa                                   | Southern      | Prospective   | Cross sectional | Random selection     | Urban and Rural | Population-based | 518  | 42  | 8.1%  | NR                                                                                                                                                                                                                                      | 40 | NR | 18 | 72 | 38  | Echocardiography | Presentation with cardiac complaints + HIV          |
| Soliman    | 2015 | 2012-2013 | Egypt                                          | Northern      | Prospective   | Cross sectional | Not random selection | Urban and Rural | Hospital-based   | 51   | 32  | 62.7% | NR                                                                                                                                                                                                                                      | 59 | NR | NR | NR | 100 | Echocardiography | Patients with chronic obstructive pulmonary disease |
| Stewart    | 2011 | 2006-2008 | South Africa                                   | Southern      | Prospective   | Cross sectional | Random selection     | Urban and Rural | Population-based | 5328 | 141 | 2.6%  | NR                                                                                                                                                                                                                                      | NR | NR | NR | NR | NR  | Echocardiography | Patients presenting with cardiac complaints         |
| Suiru      | 2015 | 2013-2014 | Cameroon                                       | Central       | Retrospective | Cross sectional | Not random selection | Urban and Rural | Hospital-based   | 2194 | 343 | 15.6% | NR                                                                                                                                                                                                                                      | NR | NR | NR | NR | NR  | Echocardiography | Patients presenting with cardiac complaints         |
| Tarrass    | 2006 |           | Morocco                                        | Northern      | Prospective   | Cross sectional | Not random selection | Urban and Rural | Hospital-based   | 86   | 23  | 26.7% | NR                                                                                                                                                                                                                                      | 45 | NR | 18 | 84 | 47  | Echocardiography | Patients in hemodialysis                            |
| Thienemann | 2016 | 2011-2013 | Cameroon, Mozambique, Nigeria and South Africa | Multinational | Prospective   | Cross sectional | Not random selection | Urban and Rural | Hospital-based   | -    | 209 | -     | 144 (68.9%) PH due to left-sided heart failure, 33 (15.8%) pulmonary arterial hypertension, 25 (12.0%) due to lung disease and/or hypoxia, 4 (1.9%) due to chronic thromboembolic and 33 (15.8%) with unclear/multifactorial mechanisms | NR | 48 | NR | NR | 41  | Echocardiography | Patients presenting with cardiac complaints         |

PH: pulmonary hypertension; NR: Not reported

\* Pulmonary arterial systolic pressure > 35 mmHg for echography and mean pulmonary arterial hypertension ≥ 25 mmHg for right heart catheterization
