# Supplementary material for: Prevalence and etiologies of pulmonary hypertension in Africa: a systematic review and meta-analysis
Source: PubMed Central journal article supplement (PMC5723068; doi:10.1186/s12890-017-0549-5), 2017-12-08
Supplement: 12890_2017_549_MOESM2_ESM.pdf [file 12890_2017_549_MOESM2_ESM.pdf]

**Additional file 2. Risk of bias in individual studies**

| <b>Studies</b>   | <b>S1</b> | <b>S2</b> | <b>S3</b> | <b>C1</b> | <b>C2</b> | <b>O1</b> | <b>O2</b> | <b>O3</b> | <b>Score</b> | <b>Risk of bias</b> |
|------------------|-----------|-----------|-----------|-----------|-----------|-----------|-----------|-----------|--------------|---------------------|
| Adem, 2014       | 1         | 1         | 1         | 1         | 1         | 1         | 1         | 1         | 8            | Low                 |
| Amadi, 2017      | 0         | 0         | 0         | 1         | 1         | 1         | 1         | 0         | 4            | High                |
| Amin, 2003       | 0         | 0         | 0         | 0         | 0         | 2         | 1         | 1         | 4            | High                |
| Amindé, 2017     | 1         | 1         | 1         | 1         | 1         | 2         | 1         | 1         | 9            | Low                 |
| Bakari, 2013     | 0         | 0         | 0         | 1         | 0         | 2         | 0         | 1         | 4            | High                |
| Conteh, 2016     | 1         | 1         | 1         | 1         | 1         | 2         | 1         | 1         | 9            | Low                 |
| Ezzahra, 2015    | 1         | 0         | 1         | 1         | 1         | 2         | 1         | 1         | 8            | Low                 |
| Ezzahra, 2015    | 1         | 0         | 1         | 1         | 1         | 1         | 1         | 1         | 7            | Moderate            |
| Faqih, 2016      | 1         | 0         | 1         | 1         | 1         | 2         | 1         | 1         | 8            | Low                 |
| Gaber, 2014      | 1         | 0         | 0         | 1         | 0         | 1         | 0         | 1         | 4            | High                |
| Kafata, 2016     | 1         | 0         | 0         | 1         | 1         | 2         | 1         | 1         | 7            | Moderate            |
| Karaye, 2013     | 1         | 1         | 1         | 1         | 1         | 2         | 1         | 1         | 9            | Low                 |
| Kingue, 2016     | 1         | 1         | 1         | 1         | 1         | 2         | 1         | 1         | 9            | Low                 |
| Mbolla, 2016     | 1         | 0         | 0         | 1         | 1         | 2         | 0         | 1         | 6            | Moderate            |
| Menanga, 2015    | 1         | 1         | 1         | 1         | 1         | 2         | 1         | 1         | 9            | Low                 |
| Methia, 2016     | 1         | 1         | 0         | 1         | 1         | 1         | 1         | 1         | 7            | Moderate            |
| Mocumbi, 2016    | 1         | 1         | 1         | 1         | 1         | 2         | 1         | 1         | 9            | Low                 |
| Okello, 2013     | 1         | 1         | 0         | 1         | 1         | 2         | 1         | 1         | 8            | Low                 |
| Reuben, 2015     | 0         | 0         | 0         | 1         | 0         | 1         | 1         | 1         | 4            | High                |
| Sliwa, 2012      | 1         | 1         | 1         | 1         | 1         | 2         | 1         | 1         | 9            | Low                 |
| Soliman, 2015    | 1         | 0         | 0         | 0         | 0         | 2         | 0         | 1         | 4            | High                |
| Stewart, 2011    | 1         | 0         | 0         | 1         | 1         | 2         | 0         | 1         | 6            | Moderate            |
| Suiru, 2015      | 1         | 0         | 1         | 1         | 1         | 1         | 1         | 1         | 7            | Moderate            |
| Tarrass, 2006    | 1         | 0         | 0         | 1         | 1         | 2         | 1         | 1         | 7            | Moderate            |
| Thienemann, 2016 | 1         | 1         | 1         | 1         | 1         | 2         | 1         | 1         | 9            | Low                 |
